# Supplementary material
Source: PubMed Central journal article supplement (PMC4006103)
Supplement: NIHMS575644-supplement-Supplementary_tables.pdf [file NIHMS575644-supplement-Supplementary_tables.pdf]

## Supplementary Tables S1-S3:

**Table S1 | Primary antibodies used in this study.**

| <b>Primary Antibodies</b>                      | <b>Companies</b>                               |
|------------------------------------------------|------------------------------------------------|
| <b>β-actin</b> (mouse monoclonal anti-)        | Sigma Aldrich (A-3853)                         |
| <b>Atg5</b> (rabbit polyclonal anti-)          | Cell Signaling (#2630)                         |
| <b>Atg8</b> (rabbit polyclonal anti-)          | See reference (41)                             |
| <b>GAPDH</b> (rabbit polyclonal anti-)         | Trevigen (#2275)                               |
| <b>H3 C-terminal</b> (rabbit polyclonal anti-) | Active Motif (#39164)                          |
| <b>H3K4me3</b> (rabbit polyclonal anti-)       | LP Bio (AR-0169)                               |
| <b>H3K4me3</b> (rabbit polyclonal anti-)       | Active Motif (#39159)                          |
| <b>H4</b> (rabbit polyclonal anti-)            | Active Motif (#61199)                          |
| <b>H4K8ac</b> (rabbit polyclonal anti-)        | Active Motif (#39171)                          |
| <b>H4K12ac</b> (rabbit polyclonal anti-)       | Active Motif (#39165)                          |
| <b>H4K16ac</b> (rabbit polyclonal anti-)       | Millipore (#07-329)                            |
| <b>H4K16ac</b> (rabbit polyclonal anti-)       | Active Motif (#39167)                          |
| <b>HA</b> (mouse monoclonal anti-)             | Sigma Aldrich(H-3663)                          |
| <b>hMOF</b> (mouse monoclonal anti-)           | GeneTex Inc. (8C4C4)                           |
| <b>hMOF</b> (rabbit polyclonal anti-)          | GeneTex Inc. (GTX104587)                       |
| <b>LC3B</b> (rabbit polyclonal anti-)          | Sigma Aldrich (L-7543)                         |
| <b>LC3A/B</b> (rabbit polyclonal anti-)        | Cell Signaling (#4108)                         |
| <b>Pgk-1</b> (rabbit polyclonal anti-)         | Dr. Jeremy Thorner<br>University of California |
| <b>SIRT1</b> (mouse monoclonal anti-)          | Sigma Aldrich (WHOO23411)                      |

**Table S2 | Reagents used in this study.**

| <b>Reagents</b>                             | <b>Companies</b>            |
|---------------------------------------------|-----------------------------|
| <b>Bafilomycin A1</b> (Baf A)               | Santa Cruz Biotechnology    |
| <b>Chloroquine</b> (CQ)                     | Sigma Aldrich               |
| <b>4',6-diamidino-2-phenylindole</b> (DAPI) | Molecular Probes/Invitrogen |
| <b>Ex527</b>                                | Tocris                      |
| <b>Hoechst</b>                              | Molecular Probes/Invitrogen |
| <b>3-methyladenine</b> (3MA)                | Tocris                      |
| <b>2-propylpentanoic acid</b> (VPA)         | Sigma Aldrich               |
| <b>Rapamycin</b>                            | LC Laboratories             |
| <b>Torin1</b>                               | Tocris                      |

**Table S3 | ON-TARGETplus SMART pool small interfering RNAs used in this study.**

This technology is based on the use of four duplex siRNAs targeting four different regions of the mRNA to be targeted (SMARTpool). This technology is also based on dual-strand modification (ON-TARGETplus) proven to reduce off target effects caused by both strands.

| <b>ON-TARGET plus SMARTpools siRNAs</b>                                                                                                                              | <b>Companies</b>     |
|----------------------------------------------------------------------------------------------------------------------------------------------------------------------|----------------------|
| <b>ATG7</b> (human, ATG7 NM_006395)<br>CCAACACACUCGAGUCUUU<br>GCCACAGAUUGGAGUAGCA<br>GAUCUAAAUCUCAACUGA<br>GCCAGAGGAUUCAACAUGA                                       | Dharmacon (L-020112) |
| <b>hMOF</b> (human, MYST1 NM_032188)<br>CGAAAUUGAUGCCUGGUAU<br>GAGAGGAAUUCUAUGUACA<br>AAAGUGCCCAGUAUAAGAA<br>GCAUUCUGCUGAAGUGAUC                                     | Dharmacon (L-014800) |
| <b>SIRT1</b> (human, SIR2L1 NM_012238)<br>CCACCUGAGUUGGAUGAUA<br>GCGAUUGGGUACCGAGAUA<br>GCAAAGGAGCAGAUUAGUA<br>GGAUAGGUCCAUAUACUUU                                   | Dharmacon (L-003540) |
| <b>Non-targeting siRNA #1</b><br>UGGUUUACAUGUCGACUAA<br>Negative control siRNA with at least 4<br>mismatches to any human, mouse, or rat gene.<br>Microarray tested. | Dharmacon (D-001810) |
